# Supplementary material
Source: publisher figshare collection journal article supplement (https://springernature.figshare.com/ndownloader/files/13853030)
Supplement: Supplementary file [file 13853030]

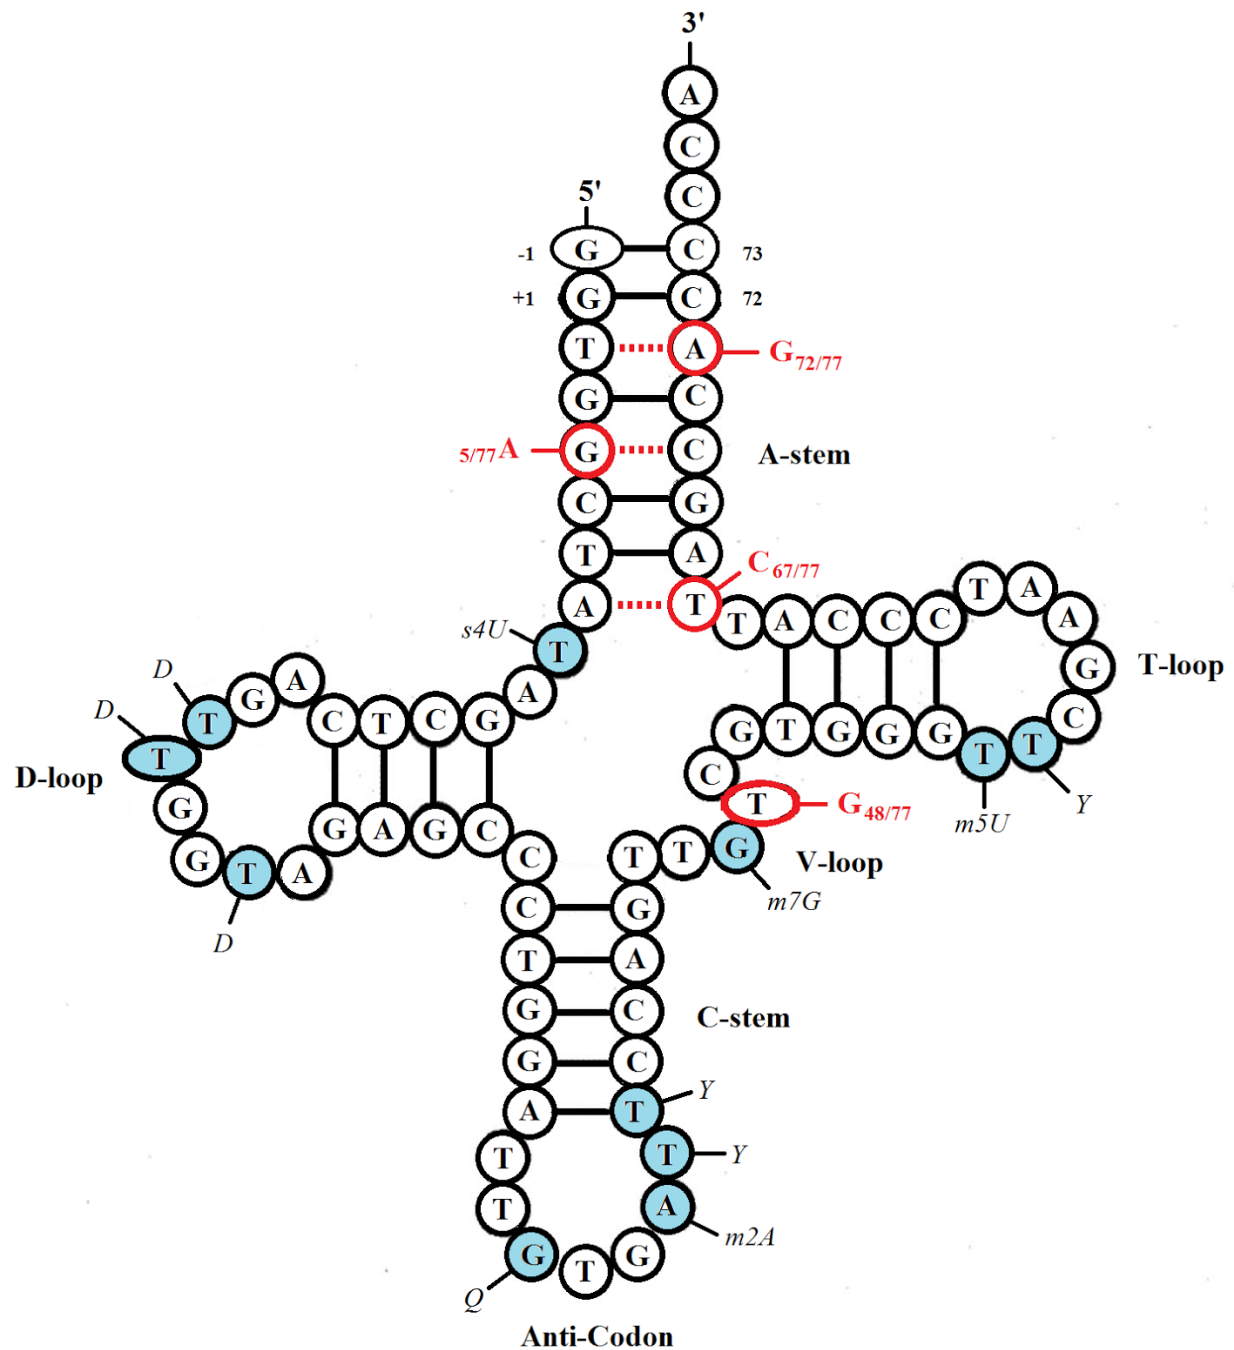

Additional File 6: Secondary structure of tRNA<sup>His</sup> and observed hisR mutations aligned with tRNA numbering convention (black numbering). tRNA modifications (blue) and observed mutations (red) are highlighted. Instability of structure caused by hisR mutations are in the acceptor stem (red dotted line).
